# Supplementary material for: Comprehensive simulations of new particle formation events in Beijing with a cluster dynamics–multicomponent sectional model
Source: Copernicus journal article supplement (doi:10.5194/acp-23-6879-2023), 2023-06-21
Supplement: Supplementary file 1 [file acp-23-6879-2023-supplement.pdf]

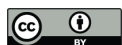

*Supplement of*

## **Comprehensive simulations of new particle formation events in Beijing with a cluster dynamics–multicomponent sectional model**

**Chenxi Li et al.**

*Correspondence to:* Huayun Xiao ([xiaohuayun@sjtu.edu.cn](mailto:xiaohuayun@sjtu.edu.cn)) and Jingkun Jiang ([jiangjk@tsinghua.edu.cn](mailto:jiangjk@tsinghua.edu.cn))

The copyright of individual parts of the supplement might differ from the article licence.

## **Information available:**

**Section S1.** Calculation method of particle formation rates and survival probability.

**Section S2.** The 5+ simulations.

**Figure S1.** Base simulations for events 4-7.

**Figure S2.** Sensitivity tests for event 2 and event 3.

**Figure S3.** Improved simulations for events 4 and 5.

**Figure S4.** Comparison of the 5+ simulations and the improved simulations.

**Figure S5.** Particle composition at a fixed time or fixed sizes.

**Figure S6.** Comparison of simulation results with different number of volatility bins for OOMs.

## S1. Calculation method of particle formation rates and survival probability

The particle formation rate  $J_{d_{min}}$  defined at a particle diameter  $d_{min}$  is calculated with the following equation,

$$J_{d_{min}}(t) = \frac{\sum_{d_{min} \leq d_i \leq d_{max}} N_i(t+\Delta t) - \sum_{d_{min} \leq d_i \leq d_{max}} N_i(t)}{\Delta t} + \frac{1}{2} \sum_{d_{min} \leq d_i, d_j \leq d_{max}} P_{ij} \beta_{ij} N_i(t) N_j(t) +$$

$$GR_{d_{max}} n_{d_{max}} + \sum_{d_{min} \leq d_i \leq d_{max}} CoagS_i(t) N_i(t). \quad (S1)$$

In Eq. S1,  $d_{max}$  is the upper boundary of the variable simulation domain (see section 2.2 in the main text),  $d_i$  is the particle diameter in the  $i^{\text{th}}$  size bin,  $N_i(t)$  is the particle number concentration in the  $i^{\text{th}}$  bin,  $\beta_{ij}$  is the collision rate coefficient between particles in the  $i^{\text{th}}$  and  $j^{\text{th}}$  bin,  $GR_{d_{max}}$  is the growth rate of particles with a diameter of  $d_{max}$ ,  $n_{d_{max}}$  is the number based particle size distribution function (in the form of  $dN/ddp$ ) at  $d_{max}$ ,  $CoagS_i(t)$  is the coagulation loss rate for particles in the  $i^{\text{th}}$  bin,  $P_{ij}$  takes a value of 1 if the coalesced particle is within the simulation domain and takes a value of 2 if the coalesced particle is outside the domain. Since we have chosen the simulation domain boundary to separate particles generated by NPF from preexisting particles,  $n_{d_{max}}$  is small and the term  $GR_{d_{max}} n_{d_{max}}$  is set to zero in the calculations.

It should be noted that Eq. S1 combines the particle flux past  $d_{min}$  from both particle growth and coagulation. Since the particle concentration in Beijing is higher than those observed in cleaner environments, including particle coagulation in formation rate calculations is necessary. Equation S1 does not account for emission of primary particles. In the presence of primary particle emissions, the first term on the right-hand side of Eq. S1 will be higher than expected if only particle growth, coagulation and loss to coagulation sinks are considered. Consequently, Eq. S1 gives a higher value of  $J_{d_{min}}$  when it is applied to the observed PSD in the presence of primary particle emissions.

The survival probability  $P_{d_1-d_2}$  as particles grow from particle diameter  $d_1$  to  $d_2$  is calculated by dividing the integrated particle formation rate at  $d_2$  by the integrated particle formation rate at  $d_1$ , i.e.,

$$P_{d_1-d_2} = \frac{\int_{t_1}^{t_2} J_{d_2} dt}{\int_{t_1}^{t_2} J_{d_1} dt} \quad (\text{S2})$$

where  $t_1$  and  $t_2$  are the lower and upper limits for integration,  $J_{d_1}$  and  $J_{d_2}$  are  
 30 calculated by Eq. S1 at  $d_{min} = d_1$  and  $d_{min} = d_2$ , respectively. In the calculation of  
 $P_{d_1-d_2}$ , particles of size  $d_1$  formed at a specific time is not traced as they grow; instead,  
 $P_{d_1-d_2}$  is an event-averaged particle survival probability for all particles that grow  
 from  $d_1$  to  $d_2$ . Since Eq. S2 is based on Eq. S1, it does not account for primary  
 particle emissions, either.

## 35 **S2. The 5+ simulations**

We have conducted simulations in which only the evolution of  $\geq 5$  nm particles  
 are simulated (hence termed ‘5+ simulations’). In these simulations, the sub 5 nm  
 particle size distributions in the simulation are taken from the measured distribution,  
 with the growth of  $\sim 5$  nm particles and the coagulation of sub 5 nm particles serving  
 40 as particle sources for the simulations above 5 nm. The cluster dynamics module still  
 runs as a source of the  $\text{SA}_x\text{DMA}_y$  clusters whose condensation contributes to particle  
 growth. However, the particles (containing more than 4 SA molecules) produced by the  
 cluster dynamics module are lost rather than going into the sections. The time-resolved  
 compositions of the  $\sim 5$  nm particles, which affect the particle growth rate but are not  
 45 available from the field observations, are taken from the corresponding full simulations.

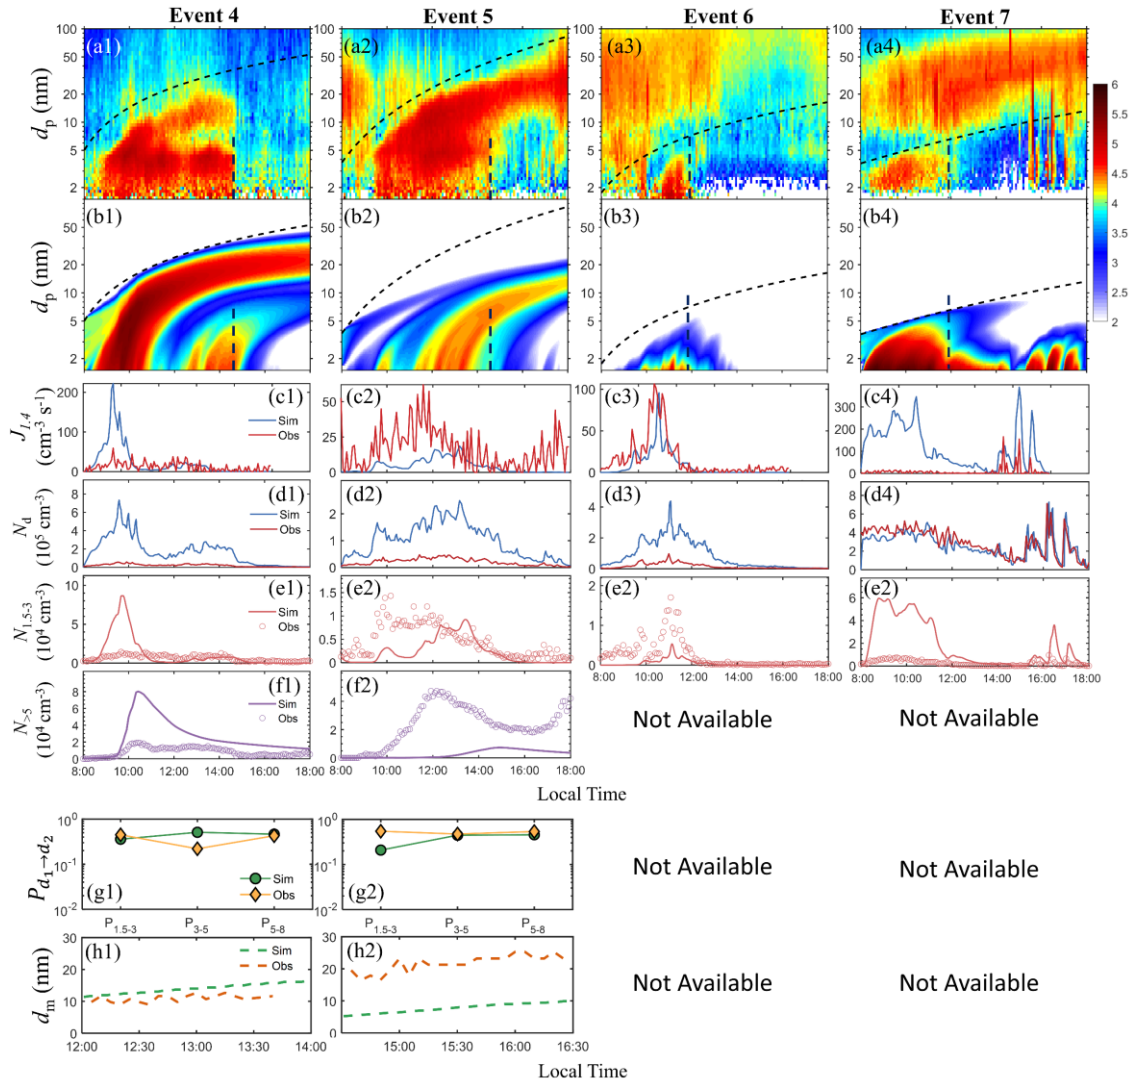

**Figure S1.** Comparison between the observation and the base case simulation for events 4-7. (a) The observed particle size distribution. (b) The simulated particle size distribution. In (a) and (b), the black dashed curves are reference curves that enclose the upper boundary of the observed PSDs which appear to originate from NPF. Vertical dashed lines approximately mark the end of the observed NPF events. (c) The simulated and the observed NPF rates at an electrical mobility diameter of 1.4 nm. (d) The simulated and the observed SA dimer concentration. (e), (f) The simulated and observed particle number concentrations between 1.5-3 nm and between 5 nm and the reference curves. (g) The simulated and the observed particle survival probability from 1.5 nm to 3 nm, from 3 nm to 5 nm and from 5 nm to 8 nm. (h) The simulated and the observed mode diameters during 12:00-14:00 (event 4) and during 14:30 and 16:30 (event 5).

50

55

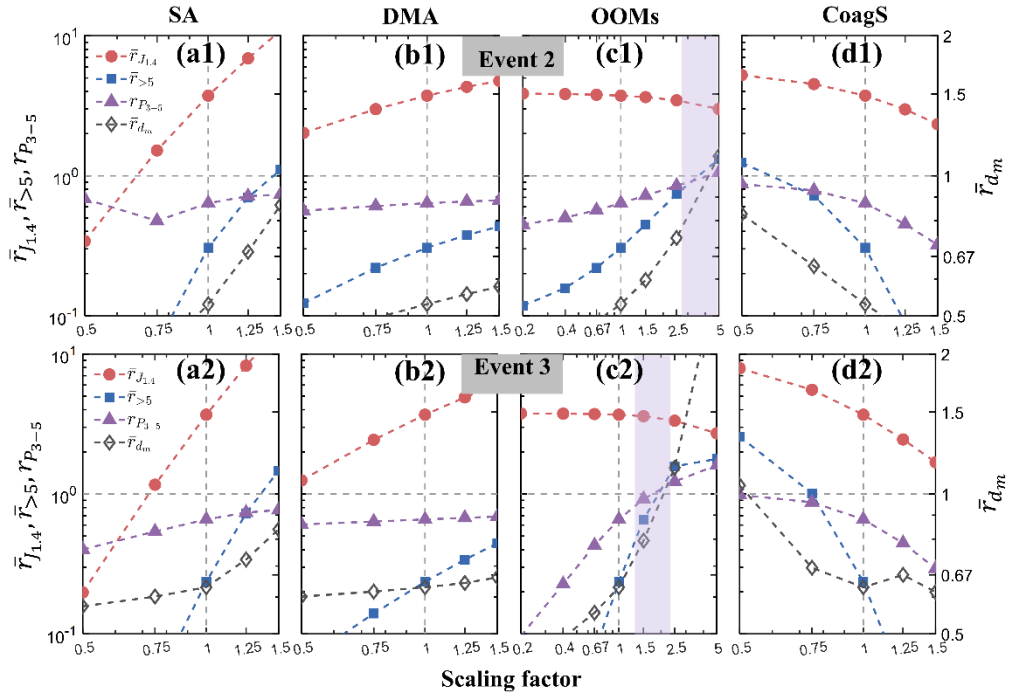

**Figure S2.** The sensitivity of  $\bar{r}_{J_{1.4}}$ ,  $\bar{r}_{>5}$ ,  $r_{P_{3-5}}$  and  $\bar{r}_{d_m}$  (see Table 2 for explanations of these quantities) to SA, DMA and OOMs concentrations and CoagS for event 2 (first row) and event 3 (second row). In the calculation,  $\bar{r}_{J_{1.4}}$ ,  $\bar{r}_{>5}$  were calculated with values averaged from 8:00 to 18:00, while  $\bar{r}_{d_m}$  was calculated with values averaged between 14:30 and 16:30.  $\bar{r}_{J_{1.4}}$ ,  $\bar{r}_{>5}$  and  $r_{P_{3-5}}$  correspond the left y-axis, and  $\bar{r}_{d_m}$  corresponds to the right y-axis. Two reference lines are shown in each plot to aid visualization: the horizontal dashed line corresponds to a ratio of unity, while the vertical dashed line corresponds to the base simulation condition. The purple shaded areas cover OOMs scaling factors at which  $\bar{r}_{>5}$ ,  $r_{P_{3-5}}$  and  $\bar{r}_{d_m}$  converge to unity.

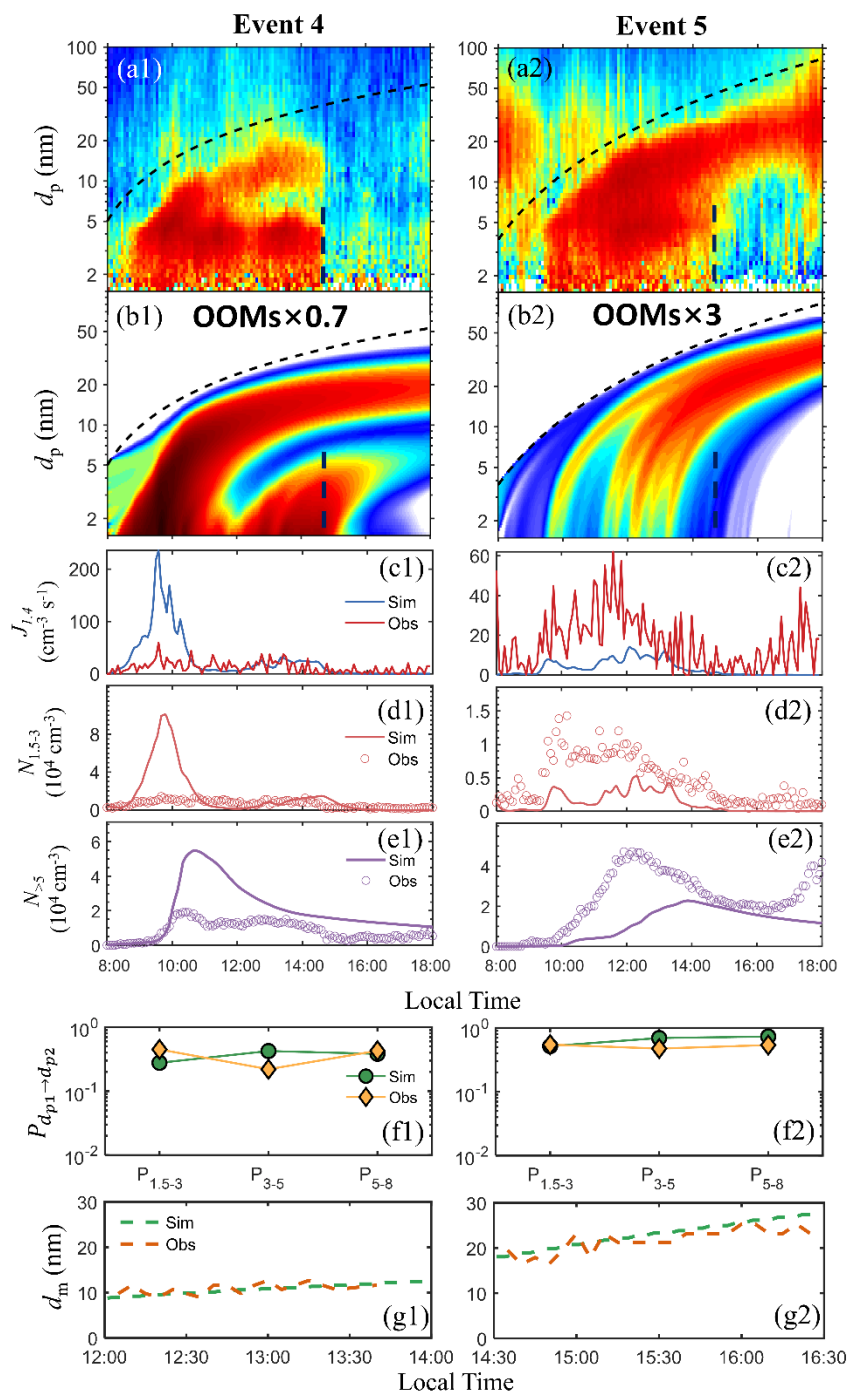

**Figure S3.** Comparison between the observation and the improved simulation for events 4 and 5.

- 70 (a) The observed particle size distribution. (b) The simulated particle size distribution. In (a) and (b), the black dashed curves are reference curves that enclose the upper boundary of the observed PSDs which appear to originate from NPF. Vertical dashed lines approximately mark the end of the observed NPF events. (c) The simulated and the observed NPF rates at an electrical mobility diameter of 1.4 nm. (d) The simulated and the observed SA dimer concentration. (e), (f) The simulated and observed particle number concentrations between 1.5-3 nm and between 5 nm and the reference curves. (g) The simulated and the observed particle survival probability from 1.5 nm to 3 nm, from 3 nm to 5 nm and from 5 nm to 8 nm. (h) The simulated and the observed mode diameters during 12:00-14:00 (event 4) and during 14:30 and 16:30 (event 5).
- 75

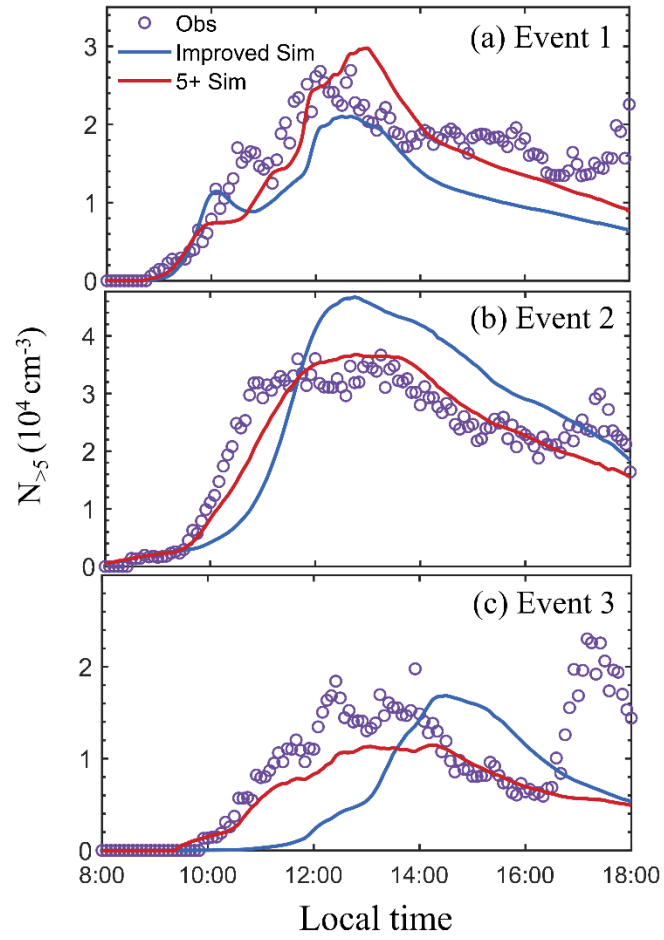

80

**Figure S4.** A comparison of  $N_{>5}$  from the field observation, the improved simulations, and the 5+ simulations for events 1-3.



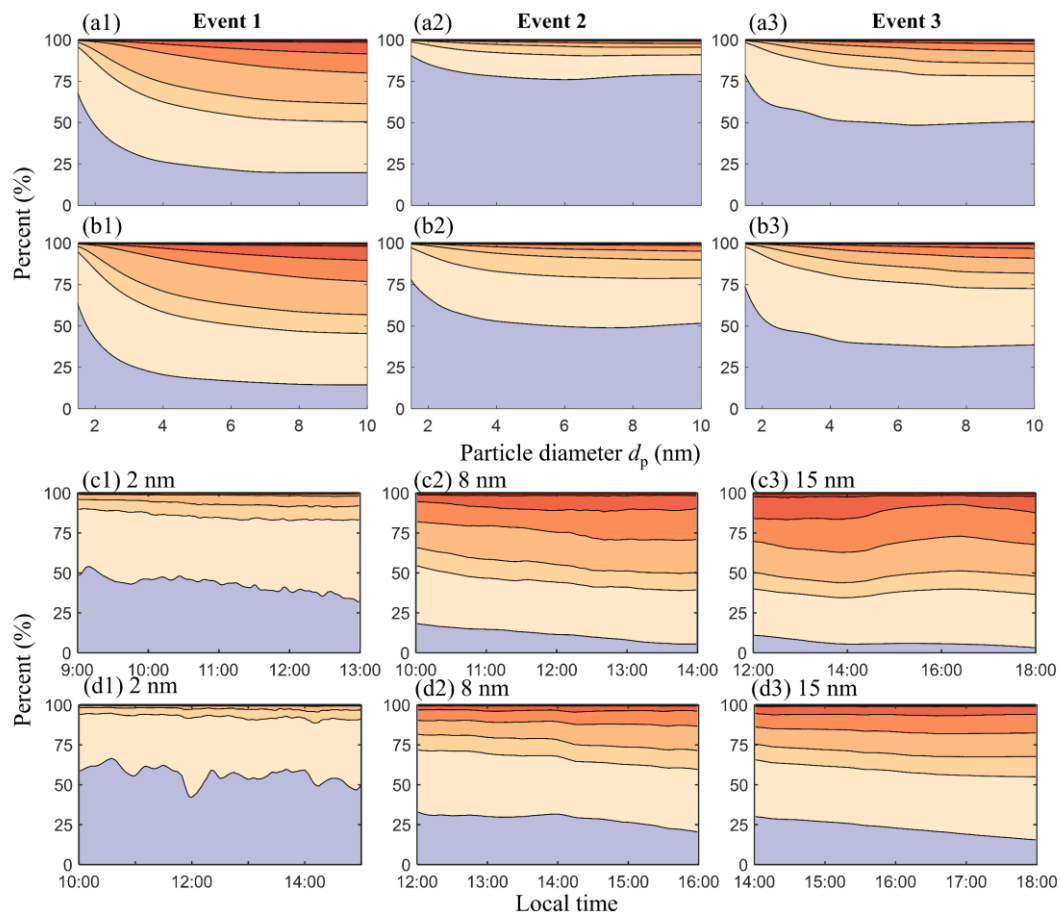

85 **Figure S5.** (a), (b) Composition of the particles smaller than 10 nm at 11:00 for events 1-3. (a) and (b) correspond to the base simulation and the improved simulations, respectively. (c), (d) Particle composition variation with time at fixed particle sizes (2 nm, 8 nm and 15 nm) for event 1 (row c) and event 3 (row d) in the improved simulations.

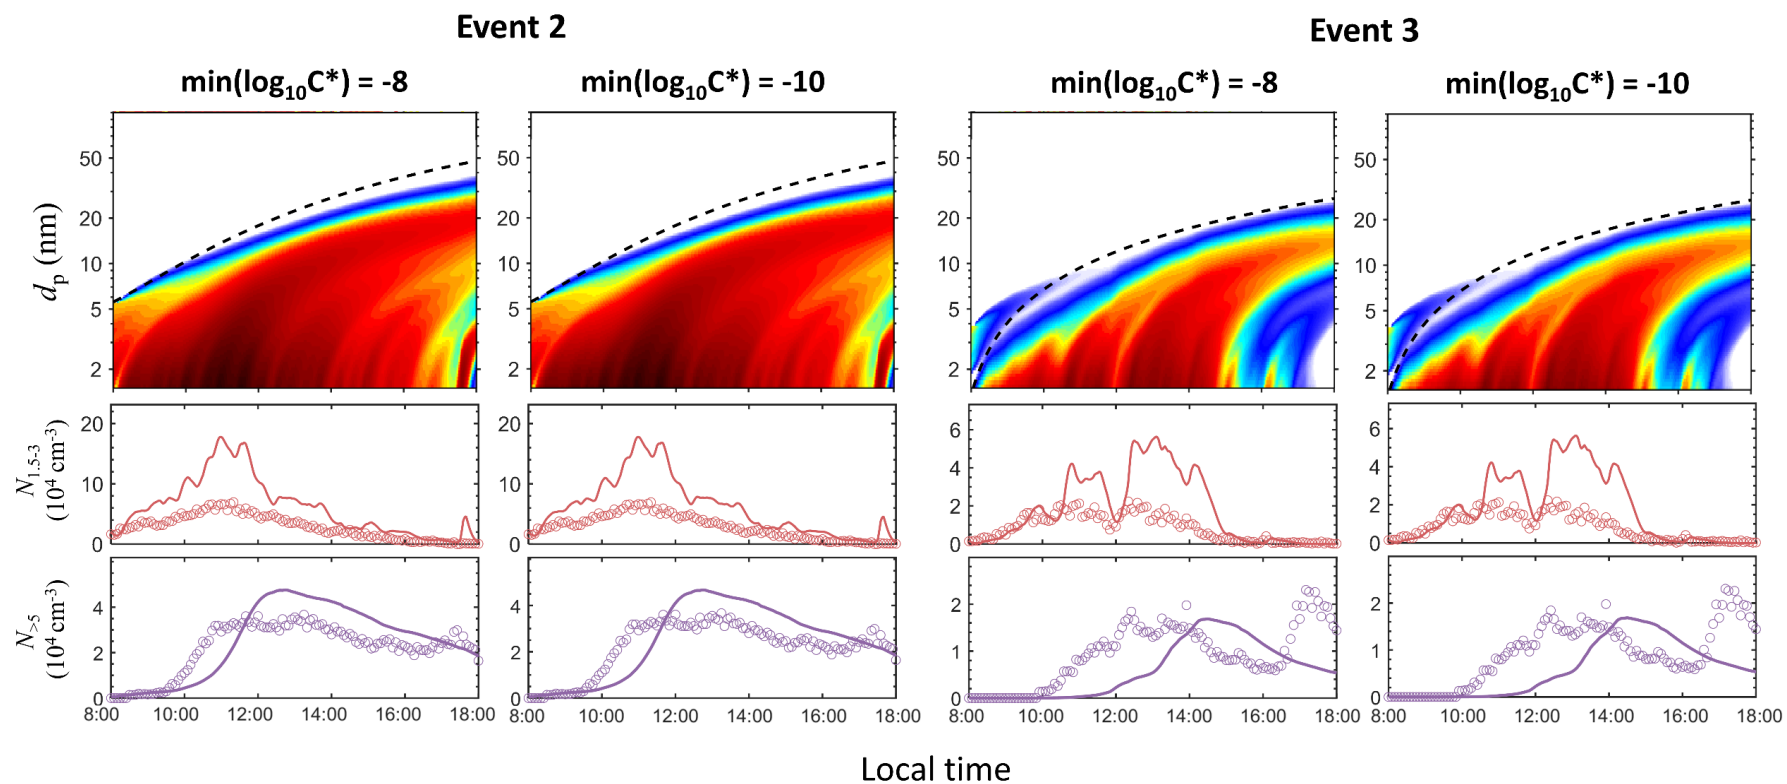

**Figure S6.** Comparison of the simulation results with 9 ( $\log_{10}C^* = -8-0$ ) and 11 ( $\log_{10}C^* = -10-0$ ) volatility bins for OOMs at the conditions of the improved simulations for event 2 and event 3. Identical results are produced by the simulation with 9 and 11 bins, indicating that using 10 volatility bins with  $\log_{10}C^* = -8-0$  are sufficient for accurately simulating particle condensation growth.
